# Supplementary material
Source: ML conference proceedings conference paper supplement (https://proceedings.neurips.cc/paper_files/paper/2024/hash/5aee125f052c90e326dcf6f380df94f6-Abstract.html)
Supplement: Supplementary file 1 [file 5aee125f052c90e326dcf6f380df94f6-Supplemental-Datasets_and_Benchmarks_Track.pdf]

---

# JaxMARL: Multi-Agent RL Environments and Algorithms in JAX

---

Alexander Rutherford<sup>1\*†</sup> Benjamin Ellis<sup>1\*†</sup> Matteo Gallici<sup>2\*†</sup> Jonathan Cook<sup>1†</sup>  
Andrei Lupu<sup>1†</sup> Garðar Ingvarsson<sup>3†</sup> Timon Willi<sup>1†</sup> Ravi Hammond<sup>1†</sup>  
Akhir Khan<sup>3</sup> Christian Schroeder de Witt<sup>1</sup> Alexandra Souly<sup>3</sup>  
Saptarashmi Bandyopadhyay<sup>4</sup> Mikayel Samvelyan<sup>3</sup> Minqi Jiang<sup>3</sup> Robert Lange<sup>5</sup>  
Shimon Whiteson<sup>1</sup> Bruno Lacerda<sup>1</sup> Nick Hawes<sup>1</sup> Tim Rocktäschel<sup>3</sup>  
Chris Lu<sup>1\*†</sup> Jakob Foerster<sup>1</sup>

<sup>1</sup>University of Oxford, <sup>2</sup>Universitat Politècnica de Catalunya, <sup>3</sup>University College London,  
<sup>4</sup>University of Maryland, <sup>5</sup>Technical University Berlin

## 1 Further Background on SMAC

StarCraft is a popular environment for testing RL algorithms. It typically features a centralised controller issuing commands to balance *micromanagement*, the low-level control of individual units, and *macromanagement*, the high level plans for economy and resource management.

SMAC [12], instead, focuses on *decentralised* unit micromanagement across a range of scenarios divided into three broad categories: *symmetric*, where each side has the same units, *asymmetric*, where the enemy team has more units, and *micro-trick*, which are scenarios designed specifically to feature a particular StarCraft micromanagement strategy. SMACv2 [5] demonstrates that open-loop policies can be effective on SMAC and adds additional randomly generated scenarios to rectify SMAC's lack of stochasticity. However, both of these environments rely on running the full game of StarCraft II, which severely increases their CPU and memory requirements. SMAClite [10] attempts to alleviate this computational burden by recreating the SMAC environment primarily in NumPy, with some core components written in C++. While this is much more lightweight than SMAC, it cannot be run on a GPU and therefore cannot be parallelised effectively with typical academic hardware, which commonly has very few CPU cores compared to industry clusters.

## 2 Further Details on Environments

### 2.1 SMAX

The StarCraft Multi-Agent Challenge (SMAC) is a popular benchmark but has a number of shortcomings. First, as noted and addressed in SMACv2, SMAC is not particularly stochastic. This means that non-trivial win-rates are possible on many SMAC maps by conditioning a policy only on the timestep and agent ID. Additionally, SMAC relies on StarCraft II as a simulator. While this allows SMAC to use the wide range of units, objects and terrain available in StarCraft II, running an entire instance of StarCraft II is slow and memory intensive. StarCraft II runs on the CPU and therefore SMAC's parallelisation is severely limited with typical academic compute.

Using the StarCraft II game engine also constrains environment design. For example, StarCraft II groups units into three races and does not allow units of different races on the same team, limiting the

---

\*Equal Contribution

†Core Contributor

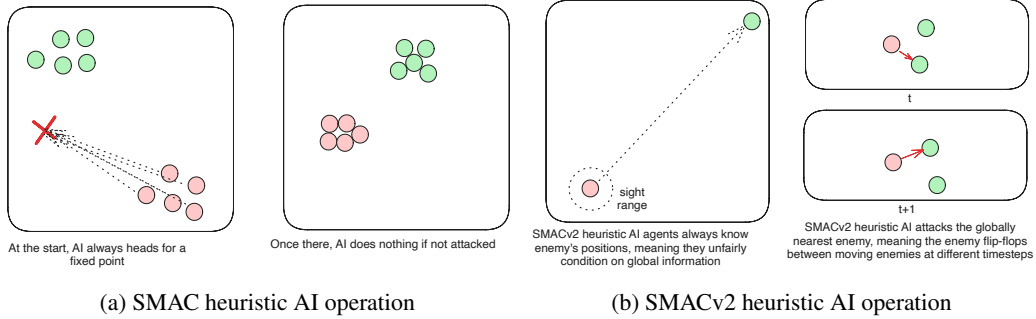

Figure 1: As shown in Figure 1a, SMAC heuristic AI is decentralised, but does not generalise to new start positions. SMACv2 heuristic AI solves the problem of not being able to locate enemies on the map, but does so via conditioning on the global state, which means that some scenarios might be unwinnable. Additionally, the SMACv2 heuristic AI targets the closest enemy, which can lead to flip-flopping between targets. This is shown in Figure 1b

27 variety of scenarios that can be generated. Secondly, SMAC does not support a competitive self-play  
 28 setting without significant engineering work. The purpose of SMAX is to address these limitations. It  
 29 provides access to a simplified SMAC-like, hardware-accelerated, customisable environment that  
 30 supports self-play and custom unit types. SMAX models units as discs in a continuous 2D space. As  
 31 listed in Table 1, we include all SMAC(v1) scenarios alongside three inspired by SMAC(v2).

32 Observations in SMAX are structured similarly to SMAC. Each agent observes the health, previous  
 33 action, position, weapon cooldown and unit type of all allies and enemies in its sight range. Like  
 34 SMACv2[5], we use the sight and attack ranges as prescribed by StarCraft II rather than the fixed  
 35 values used in SMAC.

36 SMAX and SMAC have different returns. SMAC’s reward function, like SMAX’s, is split into two  
 37 parts: one part for depleting enemy health, and another for winning the episode. However, in SMAC,  
 38 the part which rewards depleting enemy health scales with the number of agents. This is most clearly  
 39 demonstrated in 27m\_vs\_30m, where a random policy gets a return of around 10 out of a maximum of  
 40 20 because almost all the reward is for depleting enemy health or killing agents, rather than winning  
 41 the episode. In SMAX, however, 50% of the total return is always for depleting enemy health, and  
 42 50% for winning.

43 SMAX also features a different, and more sophisticated, heuristic AI. The heuristic in SMAC simply  
 44 moves to a fixed location, attacking any enemies it encounters along the way, and the heuristic in  
 45 SMACv2 globally pursues the nearest agent. Thus the SMAC AI often does not aggressively pursue  
 46 enemies that run away, and cannot generalise to the SMACv2 start positions, whereas the SMACv2  
 47 heuristic AI conditions on global information and is exploitable because of its tendency to flip-flop  
 48 between two similarly close enemies. SMAC’s heuristic AI must be coded in the map editor, which  
 49 does not provide a simple coding interface. Figure 1 demonstrates these limitations.

50 In contrast, SMAX features a decentralised heuristic AI that can effectively find enemies without  
 51 requiring the global information of the SMACv2 heuristic. This guarantees that in principle a 50%  
 52 win rate is always achievable by copying the decentralised heuristic policy exactly. This means any  
 53 win-rate below 50% represents a concrete failure to learn. Some of the capabilities of the SMAX  
 54 heuristic AI are illustrated in the Figure below.

55 Unlike StarCraft II, where all actions happen in a randomised order in the game loop, some actions in  
 56 SMAX are simultaneous, meaning draws are possible. In this case both teams get 0 reward.

57 Like SMAC, each environment step in SMAX consists of eight individual time ticks. SMAX uses  
 58 a discrete action space, consisting of movement in the four cardinal directions, a stop action, and a  
 59 shoot action per enemy.

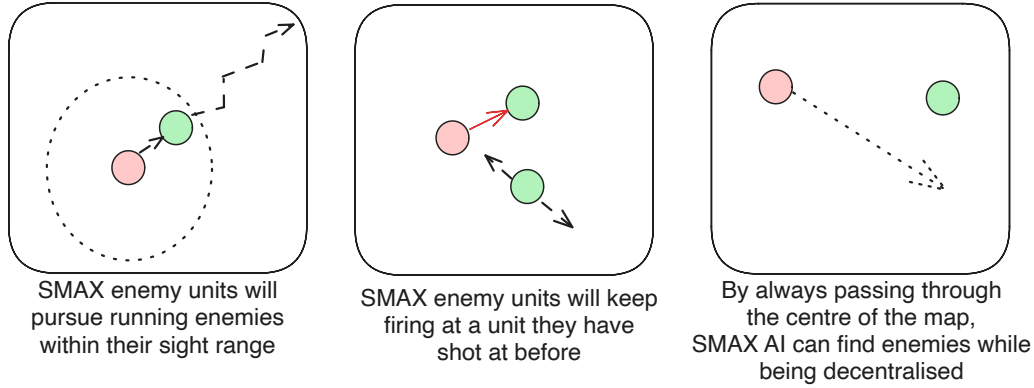

Figure 2: Explanation of the operation of the SMAX heuristic AI.

60 SMAX makes three notable simplifications of the StarCraft II dynamics to reduce complexity. First,  
 61 zerg units do not regenerate health. This health regeneration is slow at 0.38 health per second, and so  
 62 likely has little impact on the game. Protoss units also do not have shields. Shields only recharge after  
 63 10 seconds out of combat, and therefore are unlikely to recharge during a single micromanagement  
 64 task. Protoss units have additional health to compensate for their lost shields. Finally, the available  
 65 unit types are reduced compared to SMAC. SMAX has no medivac, colossus or baneling units.  
 66 Each of these unit types has special mechanics that were left out for the sake of simplicity. For the  
 67 SMACv2 scenarios, the start positions are generated as in SMACv2, with the small difference that  
 68 the ‘surrounded’ start positions now treat allies and enemies identically, rather than always spawning  
 69 allies in the middle of the map. This symmetry guarantees that a 50% win rate is always achievable.  
 70 Collisions are handled by moving agents to their desired location first and then pushing them out  
 71 from one another.

Table 1: SMAX scenarios. The first section corresponds to SMAC scenarios, while the second corresponds to SMACv2.

| Scenario        | Ally Units                   | Enemy Units                  | Start Positions |
|-----------------|------------------------------|------------------------------|-----------------|
| 2s3z            | 2 stalkers and 3 zealots     | 2 stalkers and 3 zealots     | Fixed           |
| 3s5z            | 3 stalkers and 5 zealots     | 3 stalkers and 5 zealots     | Fixed           |
| 5m_vs_6m        | 5 marines                    | 6 marines                    | Fixed           |
| 10m_vs_11m      | 10 marines                   | 11 marines                   | Fixed           |
| 27m_vs_30m      | 27 marines                   | 30 marines                   | Fixed           |
| 3s5z_vs_3s6z    | 3 stalkers and 5 zealots     | 3 stalkers and 6 zealots     | Fixed           |
| 3s_vs_5z        | 3 stalkers                   | 5 zealots                    | Fixed           |
| 6h_vs_8z        | 6 hydralisks                 | 8 zealots                    | Fixed           |
| smacv2_5_units  | 5 uniformly randomly chosen  | 5 uniformly randomly chosen  | SMACv2-style    |
| smacv2_10_units | 10 uniformly randomly chosen | 10 uniformly randomly chosen | SMACv2-style    |
| smacv2_20_units | 20 uniformly randomly chosen | 20 uniformly randomly chosen | SMACv2-style    |

## 72 2.2 Spatial-Temporal Representations of Matrix Games (STORM)

73 This environment features directional agents within an 8x8 grid world with a restricted field of view.  
 74 For a visual description, see Figure 3. Agents cannot move backwards or share the same location.  
 75 Collisions are resolved by either giving priority to the stationary agent or randomly if both are moving.  
 76 Agents collect two unique resources: *cooperate* and *defect* coins. Once an agent picks up any coin,  
 77 the agent’s colour shifts, indicating its readiness to interact. The agents can then release an *interact*  
 78 beam directly ahead; when this beam intersects with another ready agent, both are rewarded based  
 79 on the specific matrix game payoff matrix. The agents’ coin collections determine their strategies.  
 80 For instance, if an agent has 1 *cooperate* coin and 3 *defect* coins, there is a 25% likelihood of the

81 agent choosing to cooperate. After an interaction, the two agents involved are frozen for five steps,  
 82 revealing their coin collections to surrounding agents. After five steps, they respawn in a new location,  
 83 with their coin count set back to zero. Once an episode concludes, the coin placements are shuffled.  
 84 This grid-based approach to matrix games can be adapted for n-player versions. While STORM is  
 85 inspired by MeltingPot 2.0, there are noteworthy differences:

- 86 • Meltingpot uses pixel-based observations while we allow for direct grid access.
- 87 • Meltingpot’s grid size is typically 23x15, while ours is 8x8.
- 88 • Meltingpot features walls within its layout, ours does not.
- 89 • Our environment introduces stochasticity by shuffling the coin placements, which remain  
 90 static in Meltingpot.
- 91 • Our agents begin with an empty coin inventory, making it easier for them to adopt pure  
 92 cooperate or defect tactics, unlike in Meltingpot where they start with one of each coin.
- 93 • MeltingPot is implemented in Lua [8] where as ours is a vectorized implementation in JAX.

94 We deem the coin shuffling especially crucial because even large environments representing POMDPs,  
 95 such as SMAC, can be solved without the need for memory if they lack sufficient randomness [5].

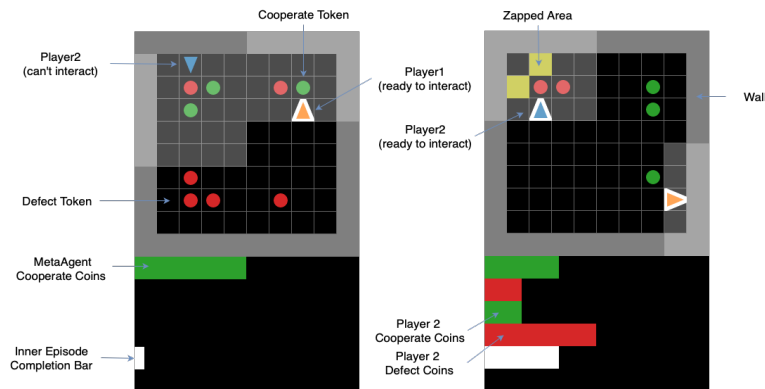

Figure 3: Annotated Image of IPDiTM renders, demonstrating the objects within the game

### 96 2.3 Coin Game

97 Coin Game is a two-player grid-world environment which emulates social dilemmas such as the  
 98 iterated prisoner’s dilemma [13]. Used as a benchmark for the general-sum setting, it expands on  
 99 simpler social dilemmas by adding a high-dimensional state. Two players, ‘red’ and ‘blue’ move in  
 100 a grid world and are each awarded 1 point for collecting any coin. However, ‘red’ loses 2 points if  
 101 ‘blue’ collects a red coin and vice versa. Thus, if both agents ignore colour when collecting coins  
 102 their expected reward is 0.

103 Two agents, ‘red’ and ‘blue’, move in a wrap-around grid and collect red and blue coloured coins.  
 104 When an agent collects any coin, the agent receives a reward of 1. However, when ‘red’ collects a  
 105 blue coin, ‘blue’ receives a reward of  $-2$  and vice versa. Once a coin is collected, a new coin of  
 106 the same colour appears at a random location within the grid. If a coin is collected by both agents  
 107 simultaneously, the coin is duplicated and both agents collect it. Episodes are of a set length.

### 108 2.4 Switch Riddle

109 Originally used to illustrate the Differentiable Inter-Agent Learning algorithm [6], Switch Riddle is a  
 110 simple cooperative communication environment that we include as a debugging tool.  $n$  prisoners held

111 by a warden can secure their release by collectively ensuring that each has passed through a room  
112 with a light bulb and a switch. Each day, a prisoner is chosen at random to enter this room. They  
113 have three choices: do nothing, signal to the next prisoner by toggling the light, or inform the warden  
114 they think all prisoners have been in the room. The game ends when a prisoner informs the warden or  
115 the maximum time steps are reached. The rewards are +1 if the prisoner informs the warden, and all  
116 prisoners have been in the room, -1 if the prisoner informs the warden before all prisoners have taken  
117 their turn, and 0 otherwise, including when the maximum time steps are reached. We benchmark  
118 using the implementation from [18].

## 119 2.5 Hanabi

120 Hanabi is a fully cooperative partially observable multiplayer card game, where players can observe  
121 other players' cards but not their own. To win, the team must play a series of cards in a specific order  
122 while sharing only a limited amount of information between players. As reasoning about the beliefs  
123 and intentions of other agents is central to performance, it is a common benchmark for ZSC and  
124 ad-hoc teamplay research. Our implementation is inspired by the Hanabi Learning Environment [2]  
125 and includes custom configurations for varying game settings, such as the number of colours/ranks,  
126 number of players, and number of hint tokens. Compared to the Hanabi Learning Environment,  
127 which is written in C++ and split over dozens of files, our implementation is a single easy-to-read  
128 Python file, which simplifies interfacing with the library and running experiments.

## 129 2.6 Overcooked

130 Inspired by the popular videogame of the same name, Overcooked is commonly used for assessing  
131 fully cooperative and fully observable Human-AI task performance. The aim is to quickly prepare  
132 and deliver soup, which involves putting three onions in a pot, cooking the soup, and serving it  
133 into bowls. Two agents, or *cooks*, must coordinate to effectively divide the tasks to maximise their  
134 common reward signal. Our implementation mimics the original from Overcooked-AI [3], including  
135 all five original layouts and a simple method for creating additional ones. For a discussion on the  
136 limitations of the Overcooked-AI environment, see [9].

## 137 2.7 Multi-Agent Particle Environments (MPE)

138 The multi-agent particle environments feature a 2D world with simple physics where particle agents  
139 can move, communicate, and interact with fixed landmarks. Each specific environment varies  
140 the format of the world and the agents' abilities, creating a diverse set of tasks that include both  
141 competitive and cooperative settings. We implement all the MPE scenarios featured in the PettingZoo  
142 library and the transitions of our implementation map exactly to theirs. We additionally include a  
143 fully cooperative predator-prey variant of *simple tag*, presented in [11]. The code is structured to  
144 allow for straightforward extensions, enabling further tasks to be added.

## 145 2.8 Multi-Agent Brax (MABrax)

146 MABrax is a derivative of Multi-Agent MuJoCo [11], an extension of the MuJoCo Gym environ-  
147 ment [15] that is commonly used for benchmarking continuous multi-agent robotic control. Our  
148 implementation utilises Brax[7] as the underlying physics engine and includes five of *Multi-Agent*  
149 *MuJoCo*'s multi-agent factorisation tasks, where each agent controls a subset of the joints and only ob-  
150 serves the local state. The included tasks, illustrated in ??, are: *ant\_4x2*, *halfcheetah\_6x1*,  
151 *hopper\_3x1*, *humanoid\_9|8*, and *walker2d\_2x3*. The task descriptions mirror those from  
152 Gymnasium-Robotics [4].

## 153 3 JaxMARL's API

154 The interface of JaxMARL is inspired by PettingZoo [14] and Gymnax. We designed it to be a  
155 simple and easy-to-use interface for a wide-range of MARL problems. An example of instantiating

```

1 import jax
2 from jaxmarl import make
3
4 key = jax.random.PRNGKey(0)
5 key, key_reset, key_act, key_step = jax.random.split(key, 4)
6
7 # Initialise and reset the environment.
8 env = make('MPE_simple_world_comm_v3')
9 obs, state = env.reset(key_reset)
10
11 # Sample random actions.
12 key_act = jax.random.split(key_act, env.num_agents)
13 actions = {agent: env.action_space(agent).sample(key_act[i]) \
14             for i, agent in enumerate(env.agents)}
15
16 # Perform the step transition.
17 obs, state, reward, done, infos = env.step(key_step, state, actions)

```

Figure 4: An example of JaxMARL’s API, which is flexible and easy-to-use.

156 an environment from JaxMARL’s registry and executing one transition is presented in Figure 4. As  
157 JAX’s JIT compilation requires pure functions, our `step` method has two additional inputs compared  
158 to PettingZoo’s. The `state` object stores the environment’s internal state and is updated with each  
159 call to `step`, before being passed to subsequent calls. Meanwhile, `key_step` is a pseudo-random  
160 key, consumed by JAX functions that require stochasticity. This key is separated from the internal  
161 state for clarity.

162 Similar to PettingZoo, the remaining inputs and outputs are dictionaries keyed by agent names,  
163 allowing for differing action and observation spaces. However, as JAX’s JIT compilation requires  
164 arrays to have static shapes, the total number of agents in an environment cannot vary during an  
165 episode. Thus, we do not use PettingZoo’s *agent iterator*. Instead, the maximum number of agents  
166 is set upon environment instantiation and any agents that terminate before the end of an episode  
167 pass dummy actions thereafter. As asynchronous termination is possible, we signal the end of an  
168 episode using a special “`__all__`” key within `done`. The same dummy action approach is taken for  
169 environments where agents act asynchronously (e.g. turn-based games).

170 To ensure clarity and reproducibility, we keep strict registration of environments with suffixed version  
171 numbers, for example “MPE Simple Spread V3”. Whenever JaxMARL environments correspond to  
172 existing CPU-based implementations, the version numbers match.

## 173 4 Value-Based MARL Methods and Implementation details

174 Key features of our framework include parameter sharing, a recurrent neural network (RNN) for  
175 agents, an epsilon-greedy exploration strategy with linear decay, a uniform experience replay buffer,  
176 and the incorporation of Double Deep Q-Learning (DDQN) [17] techniques to enhance training  
177 stability. We stored the replay buffer in GPU memory using Flashbox [16].

178 Unlike PyMARL, we use the Adam optimizer as the default optimization algorithm. Below is an  
179 introduction to common value-based MARL methods.

180 **IQL** (Independent Q-Learners) is a straightforward adaptation of Deep Q-Learning to multi-agent  
181 scenarios. It features multiple Q-Learner agents that operate independently, optimizing their individual  
182 returns. This approach follows a decentralized learning and decentralized execution pipeline.

183 **VDN** (Value Decomposition Networks) extends Q-Learning to multi-agent scenarios with a  
184 centralized-learning-decentralized-execution framework. Individual agents approximate their own  
185 action’s  $Q$ -Value, which is then summed during training to compute a jointed  $Q_{tot}$  for the global  
186 state-action pair. Back-propagation of the global DDQN loss in respect to a global team reward  
187 optimizes the factorization of the jointed  $Q$ -Value.

188 **QMIX** improves upon VDN by relaxing the full factorization requirement. It ensures that a global  
189 *argmax* operation on the total  $Q$ -Value ( $Q_{tot}$ ) is equivalent to individual *argmax* operations on  
190 each agent’s  $Q$ -Value. This is achieved using a feed-forward neural network as the mixing network,

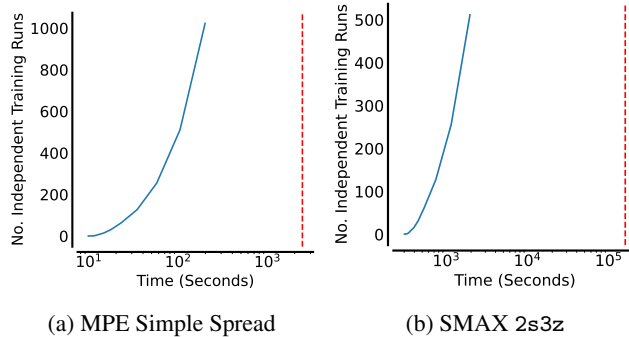

Figure 5: Time taken to train a varying number of seeds in parallel on the same device for JaxMARL IPPO (in blue) compared to the time taken to train one seed with MARLLIB (shown as the red dashed line)

191 which combines agent network outputs to produce  $Q_{tot}$  values. The global DDQN loss is computed  
 192 using a single shared reward function and is back-propagated through the mixer network to the  
 193 agents’ parameters. Hypernetworks generate the mixing network’s weights and biases, ensuring non-  
 194 negativity using an absolute activation function. These hypernetworks are two-layered multi-layer  
 195 perceptrons with ReLU non-linearity.

196 **Issues found when using Q-Learning in an end-to-end GPU setting.** As discussed in the paper’s  
 197 results section, PPO demonstrates a clear advantage over Q-Learning for our benchmarked envi-  
 198 ronments, both in agent performance and training runtime. The speed differential is caused by the  
 199 optimal sampling/replay ratio for Q-Learning methods becoming rapidly unbalanced as the number  
 200 of parallel environments increases, which requires us to use fewer parallel environments than we use  
 201 with PPO. PPO also has a major advantage over Q-Learning in that it does not use a replay buffer,  
 202 which can occupy a significant amount of GPU memory. Secondly, our experiments empirically  
 203 showed PPO to be more stable during training.

204 **A possible workaround** is to increase the replay ratio by performing multiple update steps per training  
 205 episode, which nevertheless affects computational efficiency. A better solution is to implement a  
 206 distributed framework, separating the learning and sampling process, which is also out-of-scope for  
 207 this work.

## 208 5 Speed Comparison

209 The runs reported in Figures 3 and 5(c) were all run on the same system featuring two NVIDIA  
 210 GeForce RTX 4090s (although only one was used for training), an Intel(R) Xeon(R) Silver 4316  
 211 CPU (20 cores with 40 threads), and 132 GB of RAM. We report the average environment steps per  
 212 second over the entire RL training process, which for JaxMARL includes any compilation time. For  
 213 Table 3, all results were collected on a single NVIDIA A100 GPU and AMD EPYC 7763 64-core  
 214 processor. Environments were rolled out for 1000 sequential steps.

215 In Figure 5 we repeat the analysis, reported in the main paper for QMIX, of JaxMARL’s ability to  
 216 train multiple seeds in parallel for IPPO. Training this way allows training agents many thousands of  
 217 times faster, with a 12500x speed up in the MPE simple spread environment.

## 218 6 Training & Correctness Results

### 219 6.1 Overcooked

220 We train IPPO, VDN and IQL agents in Overcooked and present their aggregate performance in  
 221 Figure 6a. IPPO performs better than the Q-Learning methods in inter-quartile mean and mean,  
 222 in line with our more general findings. During training, we use the same shaped reward as stated

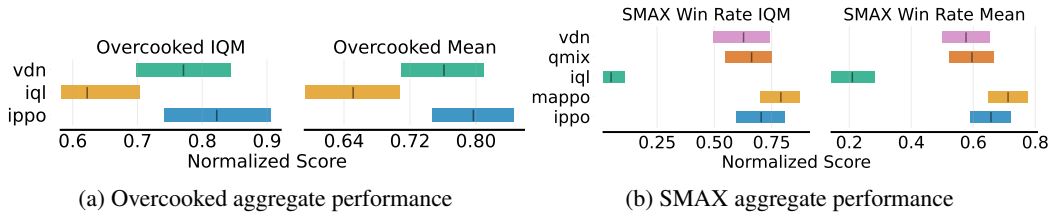

Figure 6: Aggregate performance in Overcooked and SMAX for a range of algorithms. Performance is aggregated across 10 seeds and error bars represent 95% bootstrapped confidence intervals as recommended in [1].

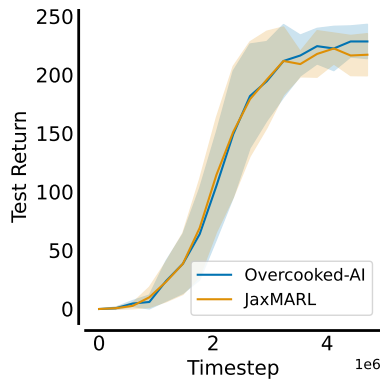

Figure 7: Evaluation performance throughout training of an IPPO policy trained with JaxMARL on our Overcooked Cramped Room scenario implementation and the original [3]. The similarity in performance demonstrates correspondence.

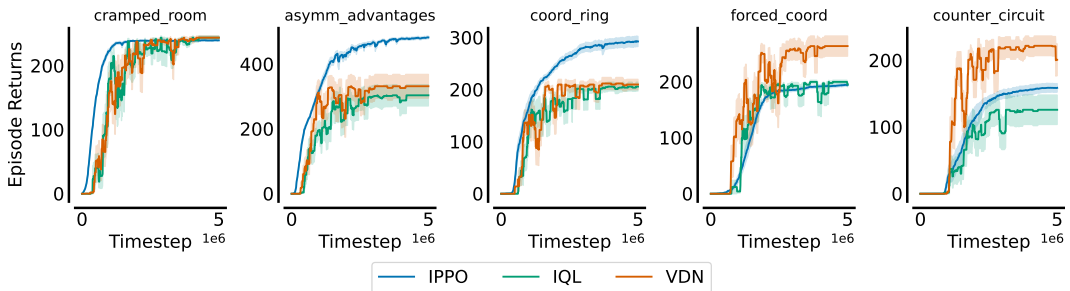

Figure 8: Evaluation of all algorithms in Overcooked scenarios. These scores are obtained after our own hyperparameter tuning, which held to better performances than the using original hyperparameters from Overcooked paper.



223 in the original Overcooked paper [3], which is added to the score of the game with a factor that is  
 224 decayed from 1 to 0 during the first half of training. We don't train MAPPO and QMIX for this task  
 225 because, in Overcooked, agents can observe the entire state of the map. Therefore, there is no partial  
 226 observability that can be improved through centralized training. We demonstrate correspondence by  
 227 training an IPPO policy with JaxMARL on our implementation and evaluating the policy over 10  
 228 rollouts for both our Overcooked implementation and the original. Results are shown in Figure 8  
 229 with the similarity in performance demonstrating their equivalence.

## 230 6.2 MABrax

231 The performance of IPPO on ant\_4x2, humanoid\_9|8, hopper\_3x1 and walker2d\_2x3 is re-  
 232 ported in Figure 9, with hyperparameters reported in Table 2.

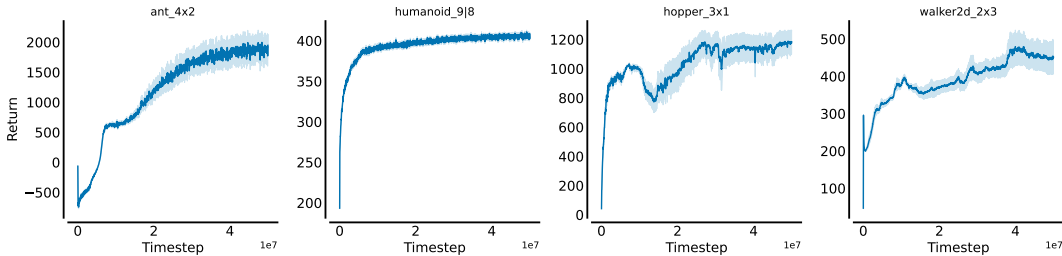

Figure 9: Performance of IPPO on MABrax Tasks

## 233 6.3 MPE

234 Performance of  $Q$ -Learning baselines in all the MPE scenarios are reported in ???. The upper row  
 235 represents cooperative scenarios, with results for all our  $Q$ -learning baselines reported. The bottom  
 236 row refers to competitive scenarios, and results for IQL are divided by agent types. Hyperparameters  
 237 are given in Table 7

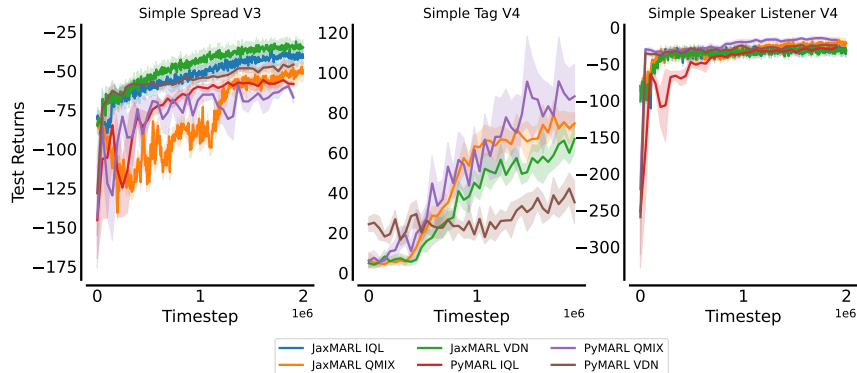

Figure 10: Comparison of the performances of  $Q$ -Learning baselines in PyMARL and JaxMARL in two cooperative scenarios of MPE (Spread and Speaker Listener) and one competitive scenario (Simple Tag). For Simple Tag, we pre-trained a prey in JaxMARL and then trained agents to compete with it in both PyMARL and JaxMARL. Despite the small differences in the obtained returns in the two frameworks, the algorithms show similar learning dynamics, and the final ordering is preserved, validating our environment and algorithm implementations.

## 238 6.4 SMAX

239 The performance of different algorithms in SMAX versus MAPPO in SMAC is shown in Figure 13.  
 240 Hyperparameters for IPPO and the  $Q$ -learning methods are given in Table 4 and Table 8 respectively.

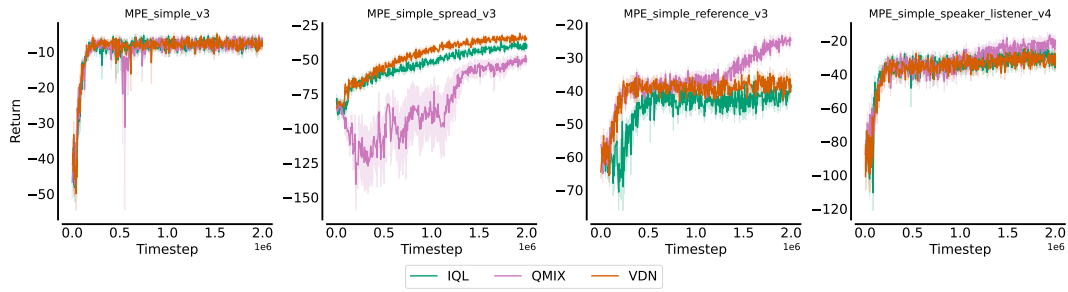

Figure 11: Evaluation of performances of QLearning in all the MPE cooperative scenarios.

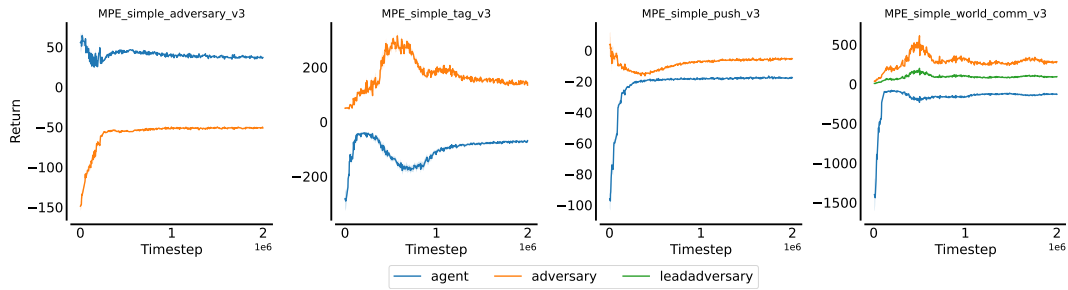

Figure 12: Evaluation of performances of IQL in all the MPE competitive scenarios. All the competitive agents are trained independently together. "Agent" and "Adversary" are teams, not single agents.

241 Some maps are significantly more difficult in SMAX, such as 10m\_vs\_11m, whereas some are much  
 242 easier such as 3s\_vs\_5z.

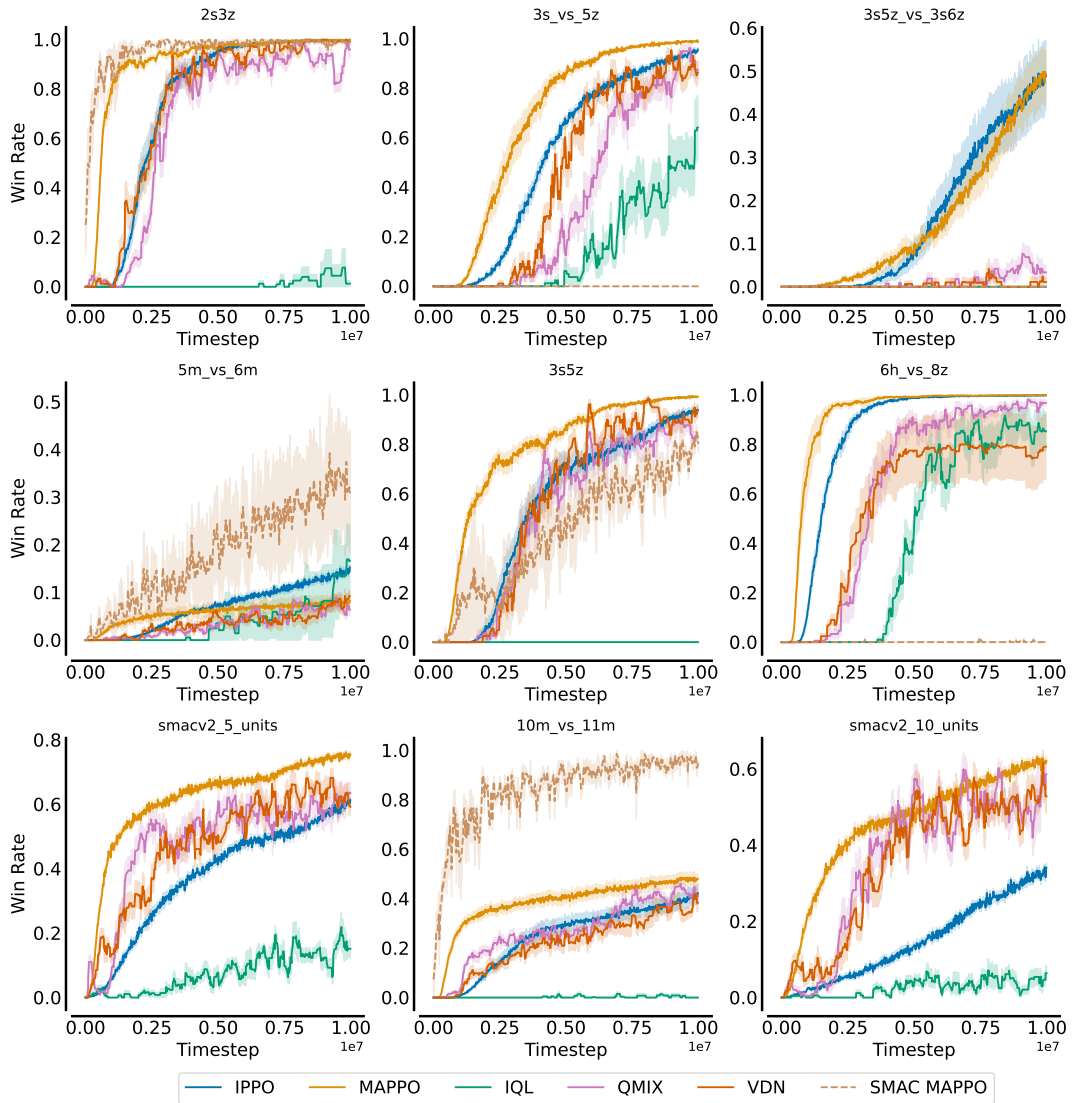

Figure 13: Comparison of IPPO, MAPPO, IQL, QMIX, VDN in SMAX with MAPPO in SMAC.

243 **7 Hyperparameters**

| Value           | Ant                | HalfCheetah          | Walker             |
|-----------------|--------------------|----------------------|--------------------|
| VF_COEF         | 4.5                | 0.14                 | 1.9                |
| ENT_COEF        | $2 \times 10^{-6}$ | $4.5 \times 10^{-3}$ | $1 \times 10^{-3}$ |
| LR              | $1 \times 10^{-3}$ | $6 \times 10^{-4}$   | $7 \times 10^{-3}$ |
| NUM_ENVS        | 64                 | –                    | –                  |
| NUM_STEPS       | 300                | –                    | –                  |
| TOTAL_TIMESTEPS | $1 \times 10^8$    | –                    | –                  |
| NUM_MINIBATCHES | 4                  | –                    | –                  |
| GAMMA           | 0.99               | –                    | –                  |
| GAE_LAMBDA      | 1.0                | –                    | –                  |
| CLIP_EPS        | 0.2                | –                    | –                  |
| MAX_GRAD_NORM   | 0.5                | –                    | –                  |
| ACTIVATION      | tanh               | –                    | –                  |
| ANNEAL_LR       | True               | –                    | –                  |

Table 2: MABrax Hyperparameters, where – indicates repeated parameters

| Hyperparameter  | Value           |
|-----------------|-----------------|
| LR              | 0.0005          |
| NUM_ENVS        | 25              |
| NUM_STEPS       | 128             |
| TOTAL_TIMESTEPS | $1 \times 10^6$ |
| UPDATE_EPOCHS   | 5               |
| NUM_MINIBATCHES | 2               |
| GAMMA           | 0.99            |
| GAE_LAMBDA      | 1.0             |
| CLIP_EPS        | 0.3             |
| ENT_COEF        | 0.01            |
| VF_COEF         | 1.0             |
| MAX_GRAD_NORM   | 0.5             |
| ACTIVATION      | tanh            |
| ANNEAL_LR       | True            |

Table 3: Hyperparameters for MPE IPPO

| Hyperparameter  | Value           |
|-----------------|-----------------|
| LR              | 0.004           |
| NUM_ENVS        | 64              |
| NUM_STEPS       | 128             |
| TOTAL_TIMESTEPS | $1 \times 10^7$ |
| UPDATE_EPOCHS   | 2               |
| NUM_MINIBATCHES | 2               |
| GAMMA           | 0.99            |
| GAE_LAMBDA      | 0.95            |
| CLIP_EPS        | 0.2             |
| SCALE_CLIP_EPS  | False           |
| ENT_COEF        | 0.0             |
| VF_COEF         | 0.5             |
| MAX_GRAD_NORM   | 0.5             |
| ACTIVATION      | relu            |

Table 4: Hyperparameters for SMAX IPPO

| Hyperparameter  | Value              |
|-----------------|--------------------|
| LR              | $5 \times 10^{-4}$ |
| NUM_ENVS        | 1024               |
| NUM_STEPS       | 128                |
| TOTAL_TIMESTEPS | $1 \times 10^{10}$ |
| UPDATE_EPOCHS   | 4                  |
| NUM_MINIBATCHES | 4                  |
| GAMMA           | 0.99               |
| GAE_LAMBDA      | 0.95               |
| CLIP_EPS        | 0.2                |
| ENT_COEF        | 0.01               |
| VF_COEF         | 0.5                |
| MAX_GRAD_NORM   | 0.5                |
| ACTIVATION      | relu               |
| ANNEAL_LR       | True               |
| NUM_FC_LAYERS   | 2                  |
| LAYER_WIDTH     | 512                |

Table 5: Hyperparameters for Hanabi IPPO

| Hyperparameter  | Value           |
|-----------------|-----------------|
| LR              | 0.0005          |
| NUM_ENVS        | 64              |
| NUM_STEPS       | 256             |
| TOTAL_TIMESTEPS | $5 \times 10^6$ |
| UPDATE_EPOCHS   | 4               |
| NUM_MINIBATCHES | 16              |
| GAMMA           | 0.99            |
| GAE_LAMBDA      | 0.95            |
| CLIP_EPS        | 0.2             |
| ENT_COEF        | 0.01            |
| VF_COEF         | 0.5             |
| MAX_GRAD_NORM   | 0.5             |
| ACTIVATION      | relu            |
| ANNEAL_LR       | True            |

Table 6: Hyperparameters for Overcooked IPPO



## 244 References

- 245 [1] Rishabh Agarwal, Max Schwarzer, Pablo Samuel Castro, Aaron C Courville, and Marc Belle-  
246 mare. Deep reinforcement learning at the edge of the statistical precipice. *Advances in neural*  
247 *information processing systems*, 34:29304–29320, 2021.
- 248 [2] Nolan Bard, Jakob N Foerster, Sarath Chandar, Neil Burch, Marc Lanctot, H Francis Song,  
249 Emilio Parisotto, Vincent Dumoulin, Subhodeep Moitra, Edward Hughes, et al. The hanabi  
250 challenge: A new frontier for ai research. *Artificial Intelligence*, 280:103216, 2020.
- 251 [3] Micah Carroll, Rohin Shah, Mark K Ho, Tom Griffiths, Sanjit Seshia, Pieter Abbeel, and Anca  
252 Dragan. On the utility of learning about humans for human-ai coordination. *Advances in neural*  
253 *information processing systems*, 32, 2019.
- 254 [4] Rodrigo de Lazcano, Kallinteris Andreas, Jun Jet Tai, Seungjae Ryan Lee, and Jordan Terry.  
255 Gymnasium robotics, 2023.
- 256 [5] Benjamin Ellis, Jonathan Cook, Skander Moalla, Mikayel Samvelyan, Mingfei Sun, Anuj  
257 Mahajan, Jakob Foerster, and Shimon Whiteson. Smacv2: An improved benchmark for  
258 cooperative multi-agent reinforcement learning. *Advances in Neural Information Processing*  
259 *Systems*, 36, 2024.
- 260 [6] Jakob Foerster, Ioannis Alexandros Assael, Nando de Freitas, and Shimon Whiteson. Learning  
261 to communicate with deep multi-agent reinforcement learning. In D. Lee, M. Sugiyama,  
262 U. Luxburg, I. Guyon, and R. Garnett, editors, *Advances in Neural Information Processing*  
263 *Systems*, volume 29. Curran Associates, Inc., 2016.
- 264 [7] C. Daniel Freeman, Erik Frey, Anton Raichuk, Sertan Girgin, Igor Mordatch, and Olivier  
265 Bachem. Brax - a differentiable physics engine for large scale rigid body simulation, 2021.
- 266 [8] Roberto Ierusalimschy. *Programming in lua*. Roberto Ierusalimschy, 2006.
- 267 [9] Niklas Lauffer, Ameesh Shah, Micah Carroll, Michael D Dennis, and Stuart Russell. Who  
268 needs to know? minimal knowledge for optimal coordination. In *International Conference on*  
269 *Machine Learning*, pages 18599–18613. PMLR, 2023.
- 270 [10] Adam Michalski, Filippos Christianos, and Stefano V Albrecht. Smaclite: A lightweight  
271 environment for multi-agent reinforcement learning. *arXiv preprint arXiv:2305.05566*, 2023.
- 272 [11] Bei Peng, Tabish Rashid, Christian Schroeder de Witt, Pierre-Alexandre Kamienny, Philip Torr,  
273 Wendelin Böhmer, and Shimon Whiteson. Facmac: Factored multi-agent centralised policy  
274 gradients. *Advances in Neural Information Processing Systems*, 34:12208–12221, 2021.
- 275 [12] Mikayel Samvelyan, Tabish Rashid, Christian Schroeder De Witt, Gregory Farquhar, Nan-  
276 tas Nardelli, Tim GJ Rudner, Chia-Man Hung, Philip HS Torr, Jakob Foerster, and Shimon  
277 Whiteson. The starcraft multi-agent challenge. *arXiv preprint arXiv:1902.04043*, 2019.
- 278 [13] Glenn H Snyder. "prisoner's dilemma" and "chicken" models in international politics. *Interna-*  
279 *tional Studies Quarterly*, 15(1):66–103, 1971.
- 280 [14] J Terry, Benjamin Black, Nathaniel Grammel, Mario Jayakumar, Ananth Hari, Ryan Sullivan,  
281 Luis S Santos, Clemens Dieffendahl, Caroline Horsch, Rodrigo Perez-Vicente, et al. Pettingzoo:  
282 Gym for multi-agent reinforcement learning. *Advances in Neural Information Processing*  
283 *Systems*, 34:15032–15043, 2021.
- 284 [15] Emanuel Todorov, Tom Erez, and Yuval Tassa. Mujoco: A physics engine for model-based  
285 control. In *2012 IEEE/RSJ International Conference on Intelligent Robots and Systems*, pages  
286 5026–5033. IEEE, 2012.

- 287 [16] Edan Toledo, Laurence Midgley, Donal Byrne, Callum Rhys Tilbury, Matthew Macfarlane,  
288 Cyprien Courtot, and Alexandre Laterre. Flashbax: Streamlining experience replay buffers for  
289 reinforcement learning with jax, 2023.
- 290 [17] Hado Van Hasselt, Arthur Guez, and David Silver. Deep reinforcement learning with double  
291 q-learning. In *Proceedings of the AAAI conference on artificial intelligence*, volume 30, 2016.
- 292 [18] Qizhen Zhang, Chris Lu, Animesh Garg, and Jakob Foerster. Centralized model and exploration  
293 policy for multi-agent rl. In *Proceedings of the 21st International Conference on Autonomous  
294 Agents and Multiagent Systems*, pages 1500–1508, 2022.
